# Supplementary material for: Robust growth of avirulent phase II Coxiella burnetii in bone marrow-derived murine macrophages
Source: PubMed Central journal article supplement (PMC5344453; doi:10.1371/journal.pone.0173528), 2017-03-09
Supplement: pone.0173528.s001.pdf [file pone.0173528.s001.pdf]

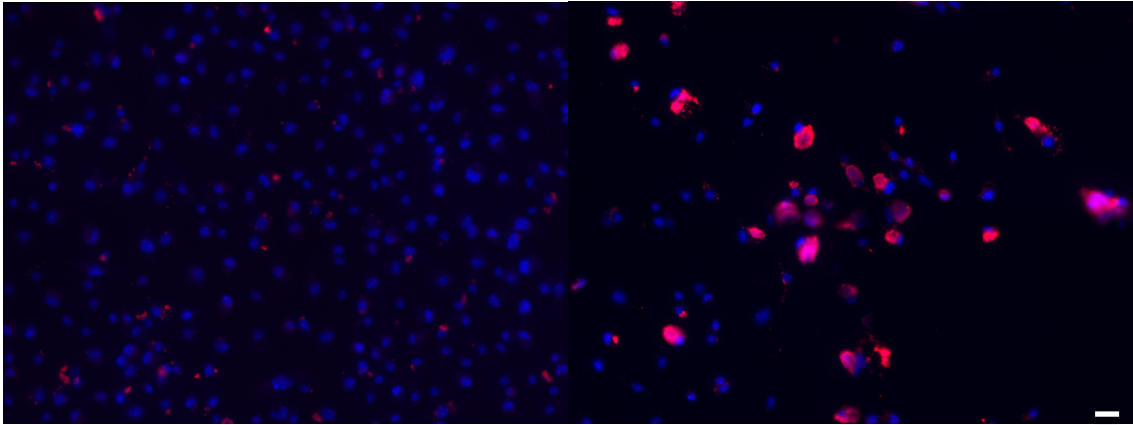

**S1 Figure. BMDM differentiated with L-929 cell conditioned medium are less permissive for NMII growth than cells differentiated with rmM-CSF. BMDM infected for 5 days (MOI=10) were fixed and stained by immunofluorescence for NMII (red). Nuclei (blue) are stained with Hoescht. Large *Coxiella*-containing vacuoles are evident in rmM-CSF, but not L-929 cell conditioned medium, treated cells. Bar, 10  $\mu$ m.**
